# Supplementary material for: Effects of carbon sources on 17 beta-estradiol degradation by Sphingomonas sp. and the analysis of the involved intracellular metabolomics
Source: Royal Society of Chemistry journal article supplement (doi:10.1039/c9em00438f), 2019-12-03
Supplement: c9em00438f1.pdf [file c9em00438f1.pdf]

**Table S1** Degradation rates of E2 by *Sphingomonas* sp. with/without various carbon sources at different stages of incubation

| Time intervals (h) | E2 alone ( $\mu\text{g}/(\text{L}\cdot\text{h})$ ) | Time intervals (h) | E2 with other carbon sources ( $\mu\text{g}/(\text{L}\cdot\text{h})$ ) |
|--------------------|----------------------------------------------------|--------------------|------------------------------------------------------------------------|
| 0-24               | 34.8                                               | 0-24               | 27.9                                                                   |
| 24-72              | 5.2                                                | 24-48              | 21.3                                                                   |
|                    |                                                    | 48-72              | 10.6                                                                   |
| 72-210             | 2.2                                                | 72-102             | 1.7                                                                    |
|                    |                                                    | 102-210            | 0.1                                                                    |

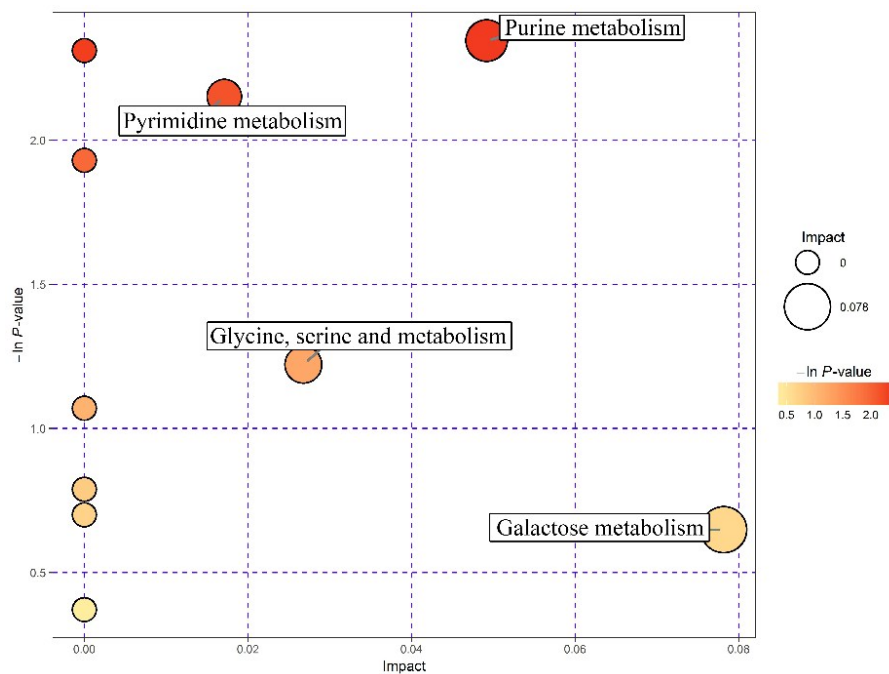

**Fig. S1** Bubble plot of centralized metabolic pathway in the presence of E2. Each bubble represents a metabolic pathway. The abscissa (bubble size) represents the influential factor in the topology analysis. The larger the size is, the higher the impact factor. The ordinate (bubble color) represents the P value (normalized as the negative natural logarithm, i.e.  $-\ln P$ -value). The deeper the color, the smaller the P value, and the more significantly enriched the metabolic pathway is
